# Supplementary material for: Therapeutic Properties and Use of Extra Virgin Olive Oil in Clinical Nutrition: A Narrative Review and Literature Update
Source: MDPI journal article supplement (doi:10.3390/nu14071440), 2022-03-31
Supplement: s1 [file s1]

**Supplementary Table S1.** Composition of fatty acids in EVOO produced from different Spanish Mediterranean cultivars (expressed in percentages). Modified from [1–13].

| Cultivar               | Location   | C14:0 | C16:0      | C16:1     | C17:0 | C17:1n-8  | C18:0     | C18:1n-9   | C18:2n-6   | C18:3n-3  | C20:0     | C20:1n-9  | C22:0     | C24:0 | ΣMUFA      | ΣPUFA      |
|------------------------|------------|-------|------------|-----------|-------|-----------|-----------|------------|------------|-----------|-----------|-----------|-----------|-------|------------|------------|
| Croatia                |            |       |            |           |       |           |           |            |            |           |           |           |           |       |            |            |
| Lavtoska [2]           | NR         | NR    | 12.3 ± 1.0 | 0.9 ± 0.1 | < LOD | 0.1 ± 0.1 | 2.3 ± 0.0 | 72.1 ± 1.4 | 10.4 ± 0.3 | 0.7 ± 0.0 | 0.4 ± 0.0 | 0.3 ± 0.0 | 0.1 ± 0.0 | NR    | NR         | NR         |
| Leccino [1]            | Šestanovac | NR    | 15.7 ± 0.0 | 1.4 ± 0.0 | NR    | 0.1 ± 0.0 | 1.8 ± 0.0 | 72.1 ± 0.0 | 7.1 ± 0.0  | 0.9 ± 0.0 | 0.4 ± 0.0 | 0.3 ±     | 0.1 ± 0.0 | 0.1 ± | 72.8 ± 0.1 | 10.5 ± 0.0 |
| Leccino [1]            | Kaštela    | NR    | 16.1 ± 0.1 | 1.7 ± 0.1 | NR    | 0.1 ± 0.0 | 1.9 ± 0.0 | 71.7 ± 0.0 | 6.7 ± 0.0  | 0.9 ± 0.0 | 0.5 ± 0.0 | 0.4 ± 0.0 | 0.1 ± 0.0 | 0.1 ± | 69.2 ± 0.0 | 13.0 ± 0.0 |
| Levantinka [2]         | NR         | NR    | 12.6 ± 1.3 | 0.9 ± 0.1 | < LOD | 0.1 ± 0.0 | 3.2 ± 0.4 | 73.0 ± 3.1 | 8.2 ± 1.1  | 0.8 ± 0.1 | 0.6 ± 0.1 | 0.3 ± 0.0 | 0.2 ± 0.0 | NR    | NR         | NR         |
| Oblica [2]             | NR         | NR    | 12.6 ±     | 0.9 ± 0.1 | < LOD | 0.1 ± 0.0 | 2.3 ± 0.2 | 70.2 ± 2.3 | 12.1 ± 1.0 | 0.7 ± 0.0 | 0.4 ± 0.0 | 0.3 ± 0.1 | < LOD     | NR    | NR         | NR         |
| Greece                 |            |       |            |           |       |           |           |            |            |           |           |           |           |       |            |            |
| Chondrolia, Chal-      | Chalkidiki | NR    | 13.2       | 1.0       | 0.04  | 0.1       | 2.1       | 75.0       | 6.8        | 0.7       | 0.5       | 0.4       | 0.1       | 0.1   | NR         | NR         |
| Koroneiki [2]          | NR         | NR    | 11.2 ± 0.6 | 0.9 ± 0.1 | 0.2 ± | 0.1 ± 0.0 | 2.6 ± 0.2 | 77.7 ± 1.8 | 5.6 ± 1.1  | 0.5 ± 0.1 | 0.5 ± 0.1 | 0.5 ± 0.1 | 0.3 ± 0.1 | NR    | NR         | NR         |
| Koroneiki [4]          | Crete      | NR    | 11.9 ± 1.9 | 0.9 ± 0.0 | 0.0 ± | 0.1 ± 0.0 | 2.8 ± 0.0 | 75.0 ± 1.1 | 6.1 ± 0.4  | 0.7 ± 0.0 | 0.4 ± 0.0 | 0.3 ± 0.0 | 0.0 ± 0.0 | 0.0 ± | NR         | NR         |
| Koroneiki (ripe) [5]   | Argolida   | 0.0 ± | 12.2 ± 0.2 | 1.3 ± 0.0 | 0.0 ± | 0.1 ± 0.0 | 3.5 ± 0.1 | 70.6 ± 0.6 | 8.1 ± 0.1  | 0.8 ± 0.0 | 0.5 ± 0.0 | 0.0 ± 0.0 | NR        | 0.1 ± | 74.0 ± 0.6 | 9.4 ± 0.2  |
| Koroneiki (green) [5]  | Argolida   | 0.0 ± | 10.8 ± 0.2 | 1.0 ± 0.0 | 0.0 ± | 0.0 ± 0.0 | 4.6 ± 0.1 | 72.4 ± 0.6 | 7.2 ± 0.1  | 0.7 ± 0.0 | 0.4 ± 0.0 | 0.0 ± 0.0 | NR        | 0.1 ± | 75.6 ± 0.6 | 8.3 ± 0.2  |
| Media Oblonga [2]      | NR         | NR    | 11.8 ± 0.1 | 0.6 ± 0.0 | 0.1 ± | 0.2 ± 0.0 | 2.1 ± 0.0 | 62.0 ± 0.3 | 19.5 ± 1.1 | 0.7 ± 0.0 | 0.3 ± 0.0 | 0.3 ± 0.0 | 0.1 ± 0.0 | NR    | NR         | NR         |
| Megaritiki (ripe) [5]  | Argolida   | 0.1 ± | 14.3 ± 0.4 | 2.8 ± 0.1 | 0.0 ± | 0.1 ± 0.0 | 2.5 ± 0.1 | 62.3 ± 0.7 | 11.6 ± 0.1 | 0.8 ± 0.0 | 0.4 ± 0.0 | 0.1 ± 0.0 | 0.1 ± 0.0 | 0.0 ± | 69.2 ± 0.4 | 12.9 ± 0.3 |
| Megaritiki (green) [5] | Argolida   | 0.0 ± | 13.4 ± 0.3 | 2.2 ± 0.1 | 0.0 ± | 0.1 ± 0.0 | 2.4 ± 0.1 | 63.9 ± 0.6 | 11.2 ± 0.1 | 0.8 ± 0.0 | 0.4 ± 0.0 | 0.2 ± 0.0 | 0.1 ± 0.0 | 0.2 ± | 70.4 ± 0.5 | 12.5 ± 0.4 |
| Throumbolia [4]        | Crete      | NR    | 12.3 ± 1.5 | 0.6 ± 0.0 | 0.1 ± | 0.2 ± 0.1 | 2.0 ± 0.0 | 62.0 ± 1.0 | 19.5 ± 1.2 | 0.7 ± 0.1 | 0.3 ± 0.2 | 0.3 ± 0.2 | 0.1 ± 0.0 | 0.0 ± | NR         | NR         |
| Italy                  |            |       |            |           |       |           |           |            |            |           |           |           |           |       |            |            |
| Castiglione [2]        | NR         | NR    | 15.0       | 1.3       | 0.1   | 0.1       | 2.5       | 72.0       | 8.0        | 0.7       | 0.3       | 0.3       | 0.1       | NR    | NR         | NR         |
| Coratina [2]           | NR         | NR    | 9.1 ± 0.3  | 0.4 ± 0.1 | 0.1 ± | 0.0 ± 0.0 | 2.4 ± 0.1 | 80.8 ± 1.0 | 6.1 ± 0.7  | 0.7 ± 0.0 | 0.4 ± 0.0 | 0.4 ± 0.0 | 0.1 ± 0.0 | NR    | NR         | NR         |
| Drita [2]              | NR         | NR    | 12.2       | 0.9       | 0.1   | 0.1       | 2.6       | 77.5       | 5.0        | 0.4       | 0.5       | 0.4       | 0.1       | NR    | NR         | NR         |
| Fantoio [2]            | NR         | NR    | 10.2 ± 1.2 | 0.6 ± 0.1 | NR    | 0.1 ± 0.0 | 1.6 ± 0.2 | 80.6 ± 3.3 | 5.4 ± 1.1  | 0.6 ± 0.2 | 0.3 ± 0.1 | 0.4 ± 0.1 | 0.1 ± 0.0 | NR    | NR         | NR         |
| Leccino [2]            | NR         | NR    | 12.7 ± 1.1 | 1.2 ± 0.0 | 0.0 ± | 0.1 ± 0.0 | 1.7 ± 0.1 | 76.0 ± 3.1 | 5.8 ± 1.5  | 0.6 ± 0.1 | 0.3 ± 0.0 | 0.2 ± 0.0 | 0.1 ± 0.0 | NR    | NR         | NR         |
| Maiatica [2]           | NR         | NR    | 11.2 ± 1.0 | 1.1 ± 0.1 | 0.0 ± | 0.1 ± 0.0 | 3.1 ± 0.2 | 75.4 ± 1.6 | 7.5 ± 0.5  | 0.5 ± 0.0 | 0.4 ± 0.0 | 0.3 ± 0.0 | 0.1 ± 0.0 | NR    | NR         | NR         |
| Moraiolo [2]           | NR         | NR    | 11.0 ± 0.4 | 0.6 ± 0.1 | 0.0 ± | 0.1 ± 0.0 | 1.8 ± 0.3 | 78.5 ± 1.7 | 6.1 ± 0.6  | 0.6 ± 0.1 | 0.3 ± 0.0 | 0.3 ± 0.1 | 0.1 ± 0.0 | NR    | NR         | NR         |
| Nocccerala [2]         | NR         | NR    | 15.0       | 1.3       | 0.1   | 0.3       | 1.6       | 65.0       | 15.7       | 0.3       | 0.7       | 0.3       | 0.1       | NR    | NR         | NR         |
| Ogliarola [2]          | NR         | NR    | 18.2 ± 0.5 | 1.0 ± 0.2 | 0.0 ± | 0.1 ± 0.0 | 2.0 ± 0.1 | 74.1 ± 1.1 | 8.6 ± 0.7  | 0.6 ± 0.0 | 0.4 ± 0.0 | 0.4 ± 0.0 | 0.1 ± 0.0 | NR    | NR         | NR         |
| Oliva Rossa [6]        | Bari       | 0.0 ± | 10.2 ± 0.0 | 0.5 ± 0.0 | 0.0 ± | 0.1 ± 0.0 | 2.6 ± 0.0 | 76.2 ± 0.0 | 8.8 ± 0.0  | 0.8 ± 0.0 | 0.4 ± 0.0 | 0.4 ± 0.0 | 0.0 ± 0.0 | 0.0 ± | 77.1 ± 0.0 | 9.6 ± 0.0  |
| Oliva Rossa [6]        | Bari       | 0.0 ± | 10.3 ± 0.0 | 0.8 ± 0.0 | 0.1 ± | 0.0 ± 0.0 | 2.6 ± 0.0 | 70.8 ± 0.2 | 13.5 ± 0.1 | 0.6 ± 0.0 | 0.6 ± 0.1 | 0.5 ± 0.0 | 0.1 ± 0.0 | 0.0 ± | 72.1 ± 0.2 | 14.1 ± 0.1 |
| Oliva Bianca [7]       | Campania   | NR    | 12.9 ± 0.2 | 0.9 ± 0.0 | 0.1 ± | NR        | 2.3 ± 0.0 | 74.8 ± 0.3 | 7.9 ± 0.1  | 0.7 ± 0.0 | 0.4 ± 0.0 | NR        | 0.1 ± 0.0 | NR    | 75.7 ± 0.3 | 8.6 ± 0.1  |
| Ottobratica [2]        | NR         | NR    | 14.4       | 1.0       | 0.2   | 0.3       | 2.4       | 71.5       | 8.6        | 0.4       | 0.6       | 0.3       | 0.1       | NR    | NR         | NR         |
| Sinopolese [2]         | NR         | NR    | 13.2       | 0.9       | 0.1   | 0.2       | 2.4       | 76.1       | 5.2        | 0.4       | 0.8       | 0.3       | 0.2       | NR    | NR         | NR         |
| Jordan                 |            |       |            |           |       |           |           |            |            |           |           |           |           |       |            |            |
| Nabali Baladi [2]      | NR         | NR    | 12.4 ± 0.1 | 1.1 ± 0.0 | 0.3 ± | 0.3 ± 0.0 | 3.0 ± 0.2 | 67.1 ± 0.3 | 3.8 ± 0.2  | 0.7 ± 0.0 | 0.6 ± 0.0 | 0.3 ± 0.0 | 0.2 ± 0.0 | NR    | NR         | NR         |
| Nabali Muhasan [2]     | NR         | NR    | 12.5 ± 0.2 | 1.1 ± 0.0 | 0.3 ± | 0.3 ± 0.0 | 3.1 ± 0.0 | 67.0 ± 0.4 | 13.9 ± 0.2 | 0.7 ± 0.0 | 0.6 ± 0.0 | 0.3 ± 0.0 | 0.2 ± 0.0 | NR    | NR         | NR         |

|                                      |             |       |            |           |         |           |           |            |            |           |           |           |           |       |            |            |
|--------------------------------------|-------------|-------|------------|-----------|---------|-----------|-----------|------------|------------|-----------|-----------|-----------|-----------|-------|------------|------------|
| Sahmi [2]                            | NR          | NR    | 16.0 ± 0.3 | 1.2 ± 0.2 | 0.1 ±   | 0.2 ± 0.0 | 2.2 ± 0.1 | 67.1 ± 0.5 | 11.4 ± 0.3 | 0.7 ± 0.1 | 0.4 ± 0.0 | 0.3 ± 0.0 | 0.1 ± 0.0 | NR    | NR         | NR         |
| <b>Supplementary Table S1. Cont.</b> |             |       |            |           |         |           |           |            |            |           |           |           |           |       |            |            |
| Cultivar                             | Location    | C14:0 | C16:0      | C16:1     | C17:0   | C17:1n-   | C18:0     | C18:1n-9   | C18:2n-6   | C18:3n-3  | C20:0     | C20:1n-   | C22:0     | C24:0 | ΣMUFA      | ΣPUFA      |
| Lebanon                              |             |       |            |           |         |           |           |            |            |           |           |           |           |       |            |            |
| Baladi [8]                           | Abdeh       | NR    | 13.9       | 0.5       | NR      | NR        | 4.0       | 67.6       | 11.8       | 0.6       | NR        | NR        | NR        | NR    | 68.1       | 67.5       |
| Baladi [8]                           | Abdeh       | NR    | 14.0       | 0.5       | NR      | NR        | 4.2       | 67.1       | 12.0       | 0.6       | NR        | NR        | NR        | NR    | 12.4       | 12.7       |
| Spain                                |             |       |            |           |         |           |           |            |            |           |           |           |           |       |            |            |
| Arbequina [9]                        | Zaragoza    | NR    | 14.5 ± 0.0 | 1.4 ± 0.0 | 0.1 ±   | 0.2 ± 0.0 | 2.0 ± 0.0 | 70.1 ± 0.0 | 10.3 ± 0.0 | 0.6 ± 0.0 | 0.4 ± 0.0 | NR        | 0.1 ± 0.0 | NR    | 71.8       | 11.1       |
| Arbequina [10]                       | Extremadura | 0.0 ± | 15.3 ± 1.4 | 1.6 ± 0.4 | 0.1 ±   | 0.23 ±    | 1.33 ±    | 67.2 ± 4.3 | 12.7 ± 2.6 | 0.6 ± 0.1 | 0.3 ± 0.1 | 0.3 ± 0.1 | NR        | NR    | 69.5 ± 4.1 | 13.3 ± 2.7 |
| Arbequina [2]                        | NR          | NR    | 12.5 ± 3.8 | 1.4 ± 0.3 | 0.1 ±   | 0.2 ± 0.0 | 1.4 ± 0.4 | 72.1 ± 3.4 | 11.4 ± 0.2 | 0.7 ± 0.1 | 0.4 ± 0.1 | 0.35 ±    | 0.1 ± 0.0 | NR    | NR         | NR         |
| Carrasqueña [2]                      | NR          | NR    | 11.4 ± 0.3 | 1.2 ± 0.1 | 0.0 ± 0 | 0.1 ± 0.0 | 2.8 ± 0.1 | 67.0 ± 1.1 | 16.0 ± 2.1 | 0.9 ± 0.0 | 0.4 ± 0.0 | 0.5 ± 0.0 | 0.3 ± 0.0 | NR    | NR         | NR         |
| Cornicabra [2]                       | NR          | NR    | 8.6 ± 1.3  | 0.7 ± 0.1 | 0.1 ±   | 0.1 ± 0.0 | 2.5 ± 0.1 | 78.7 ± 5.1 | 7.5 ± 3.9  | 0.7 ± 0.1 | 0.5 ± 0.0 | 0.4 ± 0.0 | 0.1 ± 0.0 | NR    | NR         | NR         |
| Cornicabra [9]                       | Toledo      | NR    | 8.9 ± 0.1  | 0.6 ± 0.0 | 0.1 ±   | 0.1 ± 0.0 | 3.2 ± 0.0 | 82.5 ± 0.1 | 3.3 ± 0.0  | 0.6 ± 0.0 | 0.5 ± 0.0 | NR        | 0.2 ± 0.0 | NR    | 83.2       | 4.1        |
| Cornicabra [10]                      | Extremadura | 0.0 ± | 12.1 ± 2.1 | 1.0 ± 0.3 | 0.1 ±   | 0.1 ± 0.0 | 2.4 ± 1.1 | 77.4 ± 6.1 | 5.3 ± 4.2  | 0.7 ± 0.2 | 0.4 ± 0.1 | 0.3 ± 0.0 | NR        | NR    | 78.7 ± 6.1 | 6.0 ± 4.3  |
| Cuquillo [9]                         | Murcia      | NR    | 11.2 ± 0.0 | 0.8 ± 0.0 | 0.1 ±   | 0.1 ± 0.0 | 3.1 ± 0.0 | 75.4 ± 0.0 | 7.7 ± 0.0  | 0.8 ± 0.0 | 0.4 ± 0.0 | NR        | 0.1 ± 0.0 | NR    | 76.4       | 8.7        |
| Empeltre [9]                         | Teruel      | NR    | 11.1 ± 0.0 | 0.9 ± 0.0 | 0.1 ±   | 0.2 ± 0.0 | 1.7 ± 0.0 | 72.9 ± 0.0 | 11.6 ± 0.0 | 0.8 ± 0.0 | 0.3 ± 0.0 | NR        | 0.1 ± 0.0 | NR    | 74.0       | 12.7       |
| Empeltre [2]                         | NR          | NR    | 9.6 ± 0.4  | 0.8 ± 0.0 | 0.1 ± 0 | 0.2 ± 0.0 | 1.2 ± 0.0 | 77.5 ± 1.0 | 9.1 ± 0.6  | 0.6 ± 0.0 | 0.4 ± 0.0 | 0.4 ± 0.0 | 0.1 ± 0.0 | NR    | NR         | NR         |
| Hojiblanca [2]                       | NR          | NR    | 9.3 ± 1.2  | 0.7 ± 0.2 | 0.1 ±   | 0.2 ± 0.1 | 2.5 ± 0.6 | 77.6 ± 3.0 | 8.2 ± 1.8  | 0.6 ± 0.2 | 0.3 ± 0.1 | 0.3 ± 0.1 | 0.1 ± 0.0 | NR    | NR         | NR         |
| Hojiblanca [9]                       | Jaén        | NR    | 10.6 ± 0.1 | 0.9 ± 0.0 | 0.1 ±   | 0.1 ± 0.0 | 3.7 ± 0.0 | 77.5 ± 0.1 | 5.7 ± 0.0  | 0.7 ± 0.0 | 0.4 ± 0.0 | NR        | 0.1 ± 0.0 | NR    | 78.5       | 6.6        |
| Lechín [2]                           | Sevilla     | NR    | 11.0 ± 1.1 | 1.1 ± 0.1 | 0.1 ±   | 0.2 ± 0.0 | 2.1 ± 1.0 | 74.5 ± 1.4 | 9.4 ± 1.1  | 0.7 ± 0.2 | 0.3 ± 0.1 | 0.3 ± 0.1 | 0.1 ± 0.1 | NR    | NR         | NR         |
| Lechin [9]                           | Sevilla     | NR    | 12.3 ± 0.0 | 1.0 ± 0.0 | 0.1 ±   | 0.2 ± 0.0 | 3.0 ± 0.0 | 73.8 ± 0.0 | 8.0 ± 0.0  | 0.9 ± 0.0 | 0.4 ± 0.0 | NR        | 0.0 ± 0.0 | NR    | 75.0       | 9.1        |
| Manzanilla [2]                       | NR          | NR    | 10.6 ± 1.3 | 1.0 ± 0.3 | 0.1 ±   | 0.2 ± 0.1 | 2.5 ± 0.2 | 75.6 ± 3.3 | 8.1 ± 1.6  | 0.7 ± 0.2 | 0.5 ± 0.2 | 0.4 ± 0.1 | 0.1 ± 0.0 | NR    | NR         | NR         |
| Manzanilla [2]                       | NR          | NR    | 12.5 ± 0.6 | 1.1 ± 0.4 | 0.1 ±   | 0.1 ± 0.0 | 1.7 ± 0.2 | 68.3 ± 0.9 | 14.1 ± 0.9 | 1.1 ± 0.4 | 0.4 ± 0.1 | 0.3 ± 0.1 | 0.1 ± 0.0 | NR    | NR         | NR         |
| Manzanilla [9]                       | Cáceres     | NR    | 10.1 ± 0.1 | 0.9 ± 0.0 | 0.1 ±   | 0.1 ± 0.0 | 2.8 ± 0.0 | 79.2 ± 0.0 | 5.5 ± 0.0  | 0.8 ± 0.0 | 0.5 ± 0.0 | NR        | 0.0 ± 0.0 | NR    | 80.1       | 6.5        |
| Manzanilla [10]                      | Extremadura | 0.0 ± | 12.3 ± 1.2 | 1.12 ±    | 0.0 ±   | 0.1 ± 0.0 | 1.7 ± 0.7 | 78.4 ± 3.4 | 4.8 ± 2.4  | 0.7 ± 0.1 | 0.4 ± 0.0 | 0.3 ± 0.0 | NR        | NR    | 79.9 ± 3.3 | 5.5 ± 2.4  |
| Manzanilla [10]                      | Extremadura | 0.0 ± | 13.2 ± 1.4 | 1.3 ± 0.2 | 0.2 ±   | 0.3 ± 0.1 | 2.8 ± 1.0 | 74.6 ± 2.7 | 6.0 ± 2.1  | 0.6 ± 0.2 | 0.5 ± 0.0 | 0.3 ± 0.1 | NR        | NR    | 76.5 ± 2.7 | 6.6 ± 2.2  |
| Morisca [10]                         | Extremadura | 0.0 ± | 13.9 ± 0.9 | 1.1 ± 0.2 | 0.1 ±   | 0.1 ± 0.0 | 2.7 ± 0.8 | 65.9 ± 3.2 | 14.5 ± 2.4 | 0.9 ± 0.1 | 0.4 ± 0.0 | 0.2 ± 0.0 | NR        | NR    | 67.3 ± 3.1 | 15.4 ± 2.4 |
| Pico Limón [2]                       | NR          | NR    | 9.1 ± 0.2  | 0.9 ± 0.1 | 0.2 ±   | 0.2 ± 0.0 | 2.4 ± 0.1 | 78.1 ± 2.1 | 8.0 ± 1.1  | 0.7 ± 0.0 | 0.5 ± 0.0 | 0.3 ± 0.0 | 0.1 ± 0.0 | NR    | NR         | NR         |
| Pico Limón [10]                      | Extremadura | 0.0 ± | 13.2 ± 1.3 | 1.2 ± 0.2 | 0.0 ±   | 0.1 ± 0.1 | 2.1 ± 0.6 | 74.1 ± 3.2 | 7.7 ± 2.4  | 0.6 ± 0.1 | 0.4 ± 0.0 | 0.2 ± 0.0 | NR        | NR    | 75.7 ± 3.1 | 8.3 ± 2.5  |
| Picual [2]                           | NR          | NR    | 9.6 ± 1.0  | 0.8 ± 0.2 | 0.0 ±   | 0.1 ± 0.0 | 2.8 ± 0.6 | 80.8 ± 3.1 | 4.6 ± 1.3  | 0.5 ± 0.1 | 0.3 ± 0.1 | 0.2 ± 0.1 | 0.0 ± 0.0 | NR    | NR         | NR         |
| Picual [10]                          | Extremadura | 0.0 ± | 11.6 ± 1.2 | 1.0 ± 0.2 | 0.0 ±   | 0.1 ± 0.0 | 2.0 ± 0.9 | 80.7 ± 1.9 | 3.1 ± 0.5  | 0.6 ± 0.1 | 0.4 ± 0.0 | 0.3 ± 0.0 | NR        | NR    | 82.1 ± 1.9 | 3.7 ± 0.5  |
| Picual [9]                           | Jaén        | NR    | 10.1 ± 0.0 | 0.8 ± 0.0 | 0.1 ±   | 0.1 ± 0.0 | 3.7 ± 0.0 | 78.7 ± 0.0 | 5.1 ± 0.0  | 0.9 ± 0.0 | 0.5 ± 0.0 | NR        | 0.1 ± 0.0 | NR    | 79.6       | 6.0        |
| Picudo [2]                           | NR          | NR    | 10.3 ± 0.7 | 0.9 ± 0.2 | 0.1 ±   | 0.1 ± 0.0 | 2.7 ± 0.4 | 76.6 ± 3.2 | 8.0 ± 2.2  | 0.5 ± 0.2 | 0.4 ± 0.1 | 0.3 ± 0.1 | 0.1 ± 0.0 | NR    | NR         | NR         |
| Picudo [9]                           | Córdoba     | NR    | 12.8 ± 0.0 | 1.2 ± 0.0 | 0.1 ±   | 0.1 ± 0.0 | 2.1 ± 0.0 | 72.8 ± 0.1 | 9.3 ± 0.0  | 1.0 ± 0.0 | 0.4 ± 0.0 | NR        | 0.1 ± 0.0 | NR    | 74.2       | 10.4       |
| Verdial [10]                         | Extremadura | 0.0 ± | 13.5 ± 1.7 | 0.8 ± 0.3 | 0.1 ±   | 0.1 ± 0.0 | 2.9 ± 1.0 | 63.2 ± 3.6 | 17.5 ± 3.3 | 0.8 ± 0.2 | 0.5 ± 0.0 | 0.4 ± 0.1 | NR        | NR    | 64.4 ± 3.4 | 18.3 ± 3.3 |
| Verdial [2]                          | Sevilla     | NR    | 10.2 ± 0.5 | 0.7 ± 0.1 | 0.2 ±   | 0.3 ± 0.0 | 2.5 ± 0.2 | 74.7 ± 1.8 | 9.0 ± 1.1  | 0.8 ± 0.1 | 0.5 ± 0.0 | 0.5 ± 0.1 | 0.2 ± 0.0 | NR    | NR         | NR         |

|                                      |             |       |            |           |           |           |           |            |            |           |           |           |           |       |            |             |
|--------------------------------------|-------------|-------|------------|-----------|-----------|-----------|-----------|------------|------------|-----------|-----------|-----------|-----------|-------|------------|-------------|
| Verdial [2]                          | Málaga      | NR    | 9.6 ± 0.2  | 0.6 ± 0.1 | 0.1 ±     | 0.2 ± 0.0 | 2.1 ± 0.2 | 73.4 ± 1.9 | 10.9 ± 1.2 | 1.2 ± 0.2 | 0.5 ± 0.0 | 0.4 ± 0.1 | 0.1 ± 0.0 | NR    | NR         | NR          |
| <b>Supplementary Table S1. Cont.</b> |             |       |            |           |           |           |           |            |            |           |           |           |           |       |            |             |
| Cultivar                             | Location    | C14:0 | C16:0      | C16:1     | C17:0     | C17:1n-   | C18:0     | C18:1n-9   | C18:2n-6   | C18:3n-3  | C20:0     | C20:1n-   | C22:0     | C24:0 | ΣMUFA      | ΣPUFA       |
| Tunisia                              |             |       |            |           |           |           |           |            |            |           |           |           |           |       |            |             |
| Aloui [11]                           | “North”     | NR    | 11.0 ± 2.2 | 0.6 ± 0.4 | NR        | NR        | 3.0 ± 1.0 | 67.2 ± 5.4 | 17.2 ± 3.9 | 0.7 ± 0.0 | 0.4 ± 0.0 | NR        | NR        | NR    | NR         | NR          |
| Baldi [13]                           | Gafsa       | NR    | 16.5 ± 0.0 | 0.1 ± 0.0 | 0.1 ± 0.0 | 0.2 ± 0.0 | 2.9       | 63.6 ± 0.1 | 13.5 ± 0.0 | 0.9 ± 0.1 | 0.5 ± 0.0 | 0.3       | 0.1       | 0.1 ± | 65.3 ± 0.1 | 14.4 ± 0.0  |
| Besbessi [13]                        | Gafsa       | NR    | 16.4 ± 0.3 | 0.1       | 0.1       | 0.2 ± 0.0 | 1.4 ± 0.1 | 64.7 ± 0.8 | 14.8 ± 0.4 | 0.8 ± 0.0 | 0.3 ± 0.0 | 0.2 ± 0.0 | 0.1       | 0.1 ± | 66.1 ± 0.7 | 15.6 ± 0.4  |
| Chemchali [13]                       | Sidi Bouzid | NR    | 14.2 ± 0.4 | 0.1 ± 0.0 | 0.1 ±     | 0.1 ± 0.0 | 1.8 ± 0.1 | 67.0 ±     | 14.6 ± 0.4 | 0.7 ± 0.0 | 0.4 ± 0.0 | 0.3 ± 0.0 | 0.1 ± 0.0 | 0.1 ± | 68.1 ± 0.4 | 15.34 ± 0.4 |
| Chemchali [13]                       | Gafsa       | NR    | 18.1 ± 0.4 | 0.0       | 0.0       | 0.1       | 2.1 ± 0.1 | 62.1 ± 0.3 | 14.0 ± 0.1 | 0.7 ± 0.0 | 0.4 ± 0.0 | 0.3 ± 0.0 | 0.1 ± 0.0 | 0.1   | 64.3 ± 0.4 | 14.7 ± 0.1  |
| Chemchali [13]                       | Gafsa       | NR    | 14.8 ± 0.8 | 0.0       | 0.0       | 0.0       | 2.0 ± 0.0 | 67.5 ± 0.6 | 13.0 ± 0.2 | 0.6 ± 0.0 | 0.4 ± 0.0 | 0.2 ± 0.0 | 0.1 ± 0.0 | 0.1   | 69.0 ± 0.5 | 13.6 ± 0.2  |
| Chemlali [11]                        | “Center”    | NR    | 18.6 ± 0.3 | 2.2 ± 0.2 | NR        | NR        | 2.7 ± 0.9 | 55.9 ± 0.6 | 18.0 ± 0.5 | 1.0 ± 0.1 | 0.5 ± 0.0 | NR        | NR        | NR    | 58.1 ± 0.6 | 19.0 ± 0.8  |
| Chemlali [12]                        | Hammamet    | NR    | 15.5 ± 0.1 | 1.6 ± 0.1 | 0.1 ±     | 0.2 ± 0.0 | 2.0 ± 0.1 | 65.5 ± 0.5 | 13.5 ± 1.5 | 0.4 ± 0.0 | 0.3 ± 0.0 | 0.7 ± 0.0 | NR        | NR    | 68.1 ± 0.6 | 14.0 ± 1.5  |
| Chemlali [12]                        | Gafsa       | NR    | 14.8 ± 0.5 | 1.8 ± 0.1 | 0.0 ±     | 0.1 ± 0.0 | 2.2 ± 0.2 | 66.2 ± 0.4 | 13.5 ± 1.0 | 0.4 ± 0.0 | 0.3 ± 0.0 | 0.6 ± 0.0 | NR        | NR    | 68.7 ± 0.5 | 13.9 ± 1.1  |
| Chemlali [12]                        | Kairouan    | NR    | 16.9 ± 0.8 | 2.2 ± 0.1 | 0.0 ±     | 0.1 ± 0.0 | 2.4 ± 0.0 | 60.2 ± 0.2 | 16.9 ± 0.7 | 0.4 ± 0.0 | 0.2 ± 0.0 | 0.7 ± 0.0 | NR        | NR    | 63.1 ± 0.4 | 17.3 ± 0.7  |
| Chemlali [12]                        | Sfax        | NR    | 19.5 ± 0.5 | 2.7 ± 0.0 | 0.0 ±     | 0.1 ± 0.0 | 2.7 ± 0.0 | 56.1 ± 1.0 | 17.5 ± 1.2 | 0.5 ± 0.0 | 0.2 ± 0.0 | 0.7 ± 0.0 | NR        | NR    | 59.6 ± 1.0 | 17.9 ± 1.2  |
| Chemlali [12]                        | Zarzis      | NR    | 18.7 ± 0.0 | 2.3 ± 0.1 | 0.0 ±     | 0.1 ± 0.0 | 2.9 ± 0.0 | 61.8 ± 0.3 | 12.9 ± 0.3 | 0.4 ± 0.0 | 0.2 ± 0.0 | 0.7 ± 0.0 | NR        | NR    | 64.9 ± 0.4 | 13.3 ± 0.3  |
| Chetoui [11]                         | “Center”    | NR    | 13.5 ± 0.2 | 0.3 ± 0.0 | NR        | NR        | 2.3 ± 0.2 | 68.8 ± 0.4 | 14.0 ± 0.3 | 0.5 ± 0.0 | 0.4 ± 0.0 | NR        | NR        | NR    | 69.2 ± 0.2 | 15.6 ± 0.2  |
| Chetoui [11]                         | “Center”    | NR    | 18.6 ± 0.3 | 2.2 ± 0.2 | NR        | NR        | 2.7 ± 0.9 | 55.9 ± 0.6 | 18.0 ± 0.5 | 1.0 ± 0.1 | 0.5 ± 0.0 | NR        | NR        | NR    | 58.1 ± 0.6 | 19.0 ± 0.8  |
| Chladmi [11]                         | “North”     | NR    | 14.9 ± 2.1 | 1.7 ± 0.5 | NR        | NR        | 2.8 ± 0.1 | 69.8 ± 0.9 | 9.8 ± 3.6  | 0.6 ± 0.1 | 0.4 ± 0.0 | NR        | NR        | NR    | NR         | NR          |
| Harboui [11]                         | “North”     | NR    | 14.5 ± 1.8 | 0.7 ± 0.2 | 0.0 ±     | 0.0 ± 0.0 | 2.1 ± 0.3 | 62.8 ± 3.3 | 18.4 ± 1.3 | 0.8 ± 0.1 | 0.4 ± 0.0 | 0.2 ± 0.0 | 0.1 ± 0.0 | NR    | NR         | NR          |
| Neb Jadmél [11]                      | “North”     | NR    | 16.5       | 1.3       | 0.0       | 0.0       | 2.7       | 71.0       | 10.9       | 0.7       | 0.5       | 0.2       | 0.1       | NR    | NR         | NR          |
| Neb Imel [13]                        | Gafsa       | NR    | 17.4 ± 0.0 | 0.1       | 0.1       | 0.1 ± 0.0 | 2.1 ± 0.0 | 65.8 ± 0.0 | 11.3 ± 0.0 | 0.9 ± 0.0 | 0.5       | 0.3 ± 0.0 | 0.1       | 0.1   | 67.6 ± 0.0 | 12.1 ± 0.0  |
| Regregui [11]                        | “North”     | NR    | 15.4 ± 1.0 | 0.8 ± 0.2 | 0.0 ±     | 0.0 ± 0.0 | 1.9 ± 0.1 | 62.4 ± 1.3 | 18.3 ± 0.5 | 0.7 ± 0.2 | 0.4 ± 0.0 | 0.2 ± 0.0 | 0.1 ± 0.0 | NR    | NR         | NR          |
| Rekahmi [11]                         | “North”     | NR    | 14.9 ± 2.2 | 0.6 ± 0.3 | 0.0 ±     | 0.0 ± 0.0 | 2.4 ± 0.6 | 64.6 ± 5.6 | 16.1 ± 5.1 | 0.8 ± 0.1 | 0.4 ± 0.1 | 0.2 ± 0.1 | 0.1 ± 0.0 | NR    | NR         | NR          |
| Sayali [11]                          | “North”     | NR    | 11.0       | 0.2       | NR        | NR        | 2.7       | 77.4       | 5.9        | 1.7       | 0.2       | 0.6       | NR        | NR    | NR         | NR          |
| Sehli [13]                           | Sidi Bouzid | NR    | 14.0 ± 0.2 | 0.0 ± 0.0 | 0.0 ±     | 0.0       | 2.1 ± 0.0 | 69.7 ± 0.4 | 11.4 ± 0.2 | 0.7 ± 0.0 | 0.4 ± 0.0 | 0.2 ± 0.0 | 0.1       | 0.06  | 71.3 ± 0.4 | 12.0 ± 0.2  |
| Sehli [13]                           | Sidi Bouzid | NR    | 13.5 ± 0.4 | 0.0       | 0.0       | 0.0       | 1.9 ± 0.0 | 71.9 ± 0.8 | 10.1 ± 0.3 | 0.5 ± 0.0 | 0.4 ± 0.0 | 0.2 ± 0.0 | 0.1 ± 0.0 | 0.1   | 73.4 ± 0.8 | 10.7 ± 0.3  |
| Sredki [11]                          | “North”     | NR    | 10.5 ± 0.7 | 0.5 ± 0.0 | NR        | NR        | 2.4 ± 0.2 | 74.0 ± 0.8 | 11.6 ± 1.3 | 0.6 ± 0.0 | 0.4 ± 0.1 | NR        | NR        | NR    | NR         | NR          |
| Tounssi [13]                         | Gafsa       | NR    | 16.4 ± 0.0 | 0.1       | 0.1       | 0.1 ± 0.0 | 2.9 ± 0.0 | 67.7 ± 0.0 | 9.5 ± 0.1  | 0.9 ± 0.0 | 0.6       | 0.3 ± 0.0 | 0.2 ± 0.0 | 0.1   | 69.3 ± 0.0 | 10.4 ± 0.0  |

LOD: Limit of detection; NR: Not reported

- Jukić Špika, M.; Perica, S.; Žanetić, M.; Škevin, D. Virgin olive oil phenols, fatty acid composition and sensory profile: can cultivar overpower environmental and ripening effect? *Antioxidants* **2021**, *10*, 689, doi:10.3390/antiox10050689.
- Aparicio, R.; Harwood, J.L. *Handbook of Olive Oil: Analysis and Properties*, 2nd ed.; Springer: New York, NY, USA, 2013; ISBN 978-1-4614-7776-1.

3. Mastralexi, A.; Tsimidou, M.Z. The potential of virgin olive oil from cv. chondrolia chalkidikis and chalkidiki (greece) to bear the health claims according to the European legislation. *Molecules* **2021**, *26*, 3184, doi:10.3390/molecules26113184.
4. Vekiari, S.A.; Oreopoulou, V.; Kourkoutas, Y.; Kamoun, N.; Msallem, M.; Psimouli, V.; Arapoglou, D. Characterization and seasonal variation of the quality of virgin olive oil of the throumbolia and koroneiki varieties from Southern Greece. *Grasas y Aceites* **2010**, *61*, 221–231, doi:10.3989/gya.108709.
5. Katsoyannos, E.; Batrinou, A.; Chatzilazarou, A.; Bratakos, S.M.; Stamatopoulos, K.; Sinanoglou, V.J. Quality parameters of olive oil from stoned and nonstoned koroneiki and megaritiki greek olive varieties at different maturity levels. *Grasas y Aceites* **2015**, *66*, e067–e067, doi:10.3989/gya.0711142.
6. Squeo, G.; Silletti, R.; Mangini, G.; Summo, C.; Caponio, F. The potential of apulian olive biodiversity: the case of oliva rossa virgin olive oil. *Foods* **2021**, *10*, 369, doi:10.3390/foods10020369.
7. Di Vaio, C.; Graziani, G.; Gaspari, A.; De Luca, L.; Aiello, A.; Cirillo, A.; Bruno, A.; Romano, R.; Ritieni, A. Drupe characters, fatty acids, polyphenolic and aromatic profile of olive oil obtained from “oliva bianca”, minor autochthonous cultivar of Campania. *Plants* **2021**, *10*, 1119, doi:10.3390/plants10061119.
8. El Riachy, M.; Hamade, A.; Ayoub, R.; Dandachi, F.; Chalak, L. Oil content, fatty acid and phenolic profiles of some olive varieties growing in Lebanon. *Front. Nutr.* **2019**, *6*, 94, doi:10.3389/fnut.2019.00094.
9. Ramos-Escudero, F.; Morales, M.T.; Asuero, A.G. Characterization of bioactive compounds from monovarietal virgin olive oils: relationship between phenolic compounds-antioxidant capacities. *Int. J. Food Prop.* **2015**, *18*, 348–358, doi:10.1080/10942912.2013.809542.
10. Montaña, A.; Hernández, M.; Garrido, I.; Llerena, J.; Espinosa, F. Fatty acid and phenolic compound concentrations in eight different monovarietal virgin olive oils from Extremadura and the relationship with oxidative stability. *IJMS* **2016**, *17*, 1960, doi:10.3390/ijms17111960.
11. Youssef, O.; Guido, F.; Daoud, D.; Mokhtar, Z. Effect of cultivar on minor components in Tunisia olive fruits cultivated in microclimate. *Afr. J. Wood Sci. For.* **2020**, *8*, 001–008.
12. Gargouri, B.; Ammar, S.; Zribi, A.; Mansour, A.B.; Bouaziz, M. Effect of growing region on quality characteristics and phenolic compounds of chemlali extra-virgin olive oils. *Acta Physiol Plant* **2013**, *35*, 2801–2812, doi:10.1007/s11738-013-1312-z.
13. Chtourou, F.; Valli, E.; Ben Mansour, A.; Bendini, A.; Gallina Toschi, T.; Bouaziz, M. Characterization of virgin olive oils obtained from minor Tunisian varieties for their valorization. *Food Measure* **2021**, *15*, 5060–5070, doi:10.1007/s11694-021-01066-7.

**Supplementary Table S2.** Composition of antioxidants in EVOO from different Mediterranean cultivars (expressed in mg/kg of EVOO as mean  $\pm$  sd if  $n > 1$ ) . Modified from [1–24]

| Cultivar                   | Location | HT             | TY             | VA            | PCA           | CA            | OLE            | OLEAG          | OLEAC            | LA             | OLEOC            | PINO          | LU | TPC               | $\alpha$ -T |
|----------------------------|----------|----------------|----------------|---------------|---------------|---------------|----------------|----------------|------------------|----------------|------------------|---------------|----|-------------------|-------------|
| Algeria                    |          |                |                |               |               |               |                |                |                  |                |                  |               |    |                   |             |
| Mekki [1]                  | Birtouta | 1.4 $\pm$ 0.0  | 9.0 $\pm$ 0.0  | 0.3 $\pm$ 0.0 | 0.0 $\pm$ 0.0 | 0.0 $\pm$ 0.0 | 0.0 $\pm$ 0.0  | NR             | NR               | NR             | NR               | NR            | NR | 122.3 $\pm$ 0.0   | NR          |
| Aberkane [1]               | Birtouta | 1.2 $\pm$ 0.0  | 18.4 $\pm$ 0.0 | 0.4 $\pm$ 0.0 | 0.0 $\pm$ 0.0 | 0.0 $\pm$ 0.0 | 0.0 $\pm$ 0.0  | NR             | NR               | NR             | NR               | NR            | NR | 137.2 $\pm$ 0.2   | NR          |
| Aghenaou [1]               | Birtouta | 2.4 $\pm$ 0.0  | 18.1 $\pm$ 0.0 | 0.4 $\pm$ 0.0 | 0.0 $\pm$ 0.0 | 0.0 $\pm$ 0.0 | 0.0 $\pm$ 0.0  | NR             | NR               | NR             | NR               | NR            | NR | 191.5 $\pm$ 0.7   | NR          |
| Aghenfas [1]               | Birtouta | 3.9 $\pm$ 0.0  | 25.1 $\pm$ 0.0 | 0.3 $\pm$ 0.0 | 0.0 $\pm$ 0.0 | 0.0 $\pm$ 0.0 | 0.8 $\pm$ 0.0  | NR             | NR               | NR             | NR               | NR            | NR | 228.7 $\pm$ 0.0   | NR          |
| Aimeli [1]                 | Birtouta | 6.3 $\pm$ 0.0  | 18.3 $\pm$ 0.0 | 0.3 $\pm$ 0.0 | 0.0 $\pm$ 0.0 | 0.0 $\pm$ 0.0 | 0.0 $\pm$ 0.0  | NR             | NR               | NR             | NR               | NR            | NR | 185.5 $\pm$ 0.1   | NR          |
| Blanquette [1]             | Birtouta | 9.0 $\pm$ 0.0  | 21.5 $\pm$ 0.1 | 0.6 $\pm$ 0.0 | 0.0 $\pm$ 0.0 | 0.0 $\pm$ 0.0 | 1.3 $\pm$ 0.1  | NR             | NR               | NR             | NR               | NR            | NR | 218.9 $\pm$ 0.0   | NR          |
| Bouchouk [1]               | Birtouta | 4.2 $\pm$ 0.0  | 14.5 $\pm$ 0.0 | 0.3 $\pm$ 0.0 | 0.0 $\pm$ 0.0 | 0.0 $\pm$ 0.0 | 0.3 $\pm$ 0.0  | NR             | NR               | NR             | NR               | NR            | NR | 199.4 $\pm$ 0.0   | NR          |
| Boughenfas [1]             | Birtouta | 2.8 $\pm$ 0.0  | 26.3 $\pm$ 0.0 | 0.2 $\pm$ 0.0 | 0.0 $\pm$ 0.0 | 0.0 $\pm$ 0.0 | 1.6 $\pm$ 0.0  | NR             | NR               | NR             | NR               | NR            | NR | 167.6 $\pm$ 0.0   | NR          |
| Bouichret [1]              | Birtouta | 4.2 $\pm$ 0.0  | 13.5 $\pm$ 0.0 | 0.2 $\pm$ 0.0 | 0.1 $\pm$ 0.0 | 0.1 $\pm$ 0.0 | 0.0 $\pm$ 0.0  | NR             | NR               | NR             | NR               | NR            | NR | 194.1 $\pm$ 0.1   | NR          |
| Bounguergueb [1]           | Birtouta | 3.5 $\pm$ 0.0  | 14.1 $\pm$ 0.0 | 1.0 $\pm$ 0.0 | 0.0 $\pm$ 0.0 | 0.7 $\pm$ 0.0 | 0.0 $\pm$ 0.0  | NR             | NR               | NR             | NR               | NR            | NR | 145.4 $\pm$ 0.0   | NR          |
| Chemlal [1]                | Birtouta | 4.2 $\pm$ 0.0  | 19.2 $\pm$ 0.0 | 0.6 $\pm$ 0.0 | 0.1 $\pm$ 0.0 | 0.0 $\pm$ 0.0 | 0.0 $\pm$ 0.0  | NR             | NR               | NR             | NR               | NR            | NR | 235.8 $\pm$ 0.0   | NR          |
| Grosse du Hama [1]         | Birtouta | 14.9 $\pm$ 0.0 | 33.0 $\pm$ 0.0 | 0.2 $\pm$ 0.0 | 0.0 $\pm$ 0.0 | 0.0 $\pm$ 0.0 | 0.4 $\pm$ 0.0  | NR             | NR               | NR             | NR               | NR            | NR | 322.2 $\pm$ 0.0   | NR          |
| Hamra [1]                  | Birtouta | 4.1 $\pm$ 0.0  | 20.7 $\pm$ 0.0 | 1.7 $\pm$ 0.0 | 0.2 $\pm$ 0.0 | 0.2 $\pm$ 0.0 | 13.1 $\pm$ 0.0 | NR             | NR               | NR             | NR               | NR            | NR | 166.0 $\pm$ 0.0   | NR          |
| Limli [1]                  | Birtouta | 2.9 $\pm$ 0.0  | 18.2 $\pm$ 0.0 | 0.2 $\pm$ 0.0 | 0.0 $\pm$ 0.0 | 0.0 $\pm$ 0.0 | 0.0 $\pm$ 0.0  | NR             | NR               | NR             | NR               | NR            | NR | 128.5 $\pm$ 0.1   | NR          |
| Neb djemel [1]             | Birtouta | 4.4 $\pm$ 0.0  | 17.1 $\pm$ 0.0 | 0.3 $\pm$ 0.0 | 0.0 $\pm$ 0.0 | 0.0 $\pm$ 0.0 | 0.0 $\pm$ 0.0  | NR             | NR               | NR             | NR               | NR            | NR | 194.0 $\pm$ 0.0   | NR          |
| Ronde de miliana [1]       | Birtouta | 0.0 $\pm$ 0.0  | 20.1 $\pm$ 0.0 | 0.7 $\pm$ 0.0 | 0.0 $\pm$ 0.0 | 0.1 $\pm$ 0.0 | 1.5 $\pm$ 0.0  | NR             | NR               | NR             | NR               | NR            | NR | 235.1 $\pm$ 0.0   | NR          |
| Rougette de la mitidja [1] | Birtouta | 4.6 $\pm$ 0.0  | 19.6 $\pm$ 0.0 | 0.2 $\pm$ 0.0 | 0.3 $\pm$ 0.0 | 0.1 $\pm$ 0.0 | 1.2 $\pm$ 0.0  | NR             | NR               | NR             | NR               | NR            | NR | 113.4 $\pm$ 0.1   | NR          |
| Sigoise [1]                | Birtouta | 1.4 $\pm$ 0.0  | 27.8 $\pm$ 0.0 | 0.1 $\pm$ 0.0 | 0.0 $\pm$ 0.0 | 0.0 $\pm$ 0.0 | 0.2 $\pm$ 0.0  | NR             | NR               | NR             | NR               | NR            | NR | 234.2 $\pm$ 0.0   | NR          |
| Croatia                    |          |                |                |               |               |               |                |                |                  |                |                  |               |    |                   |             |
| Oblica [2]                 | Ugljan   | 18.2 $\pm$ 3.0 | 8.1 $\pm$ 0.3  | 0.6 $\pm$ 0.2 | 0.4 $\pm$ 0.0 | 0.8 $\pm$ 0.2 | NR             | NR             | 300.0 $\pm$ 32.0 | NR             | NR               | 4.0 $\pm$ 0.1 | NR | 506.0 $\pm$ 63.0  | NR          |
| Greece                     |          |                |                |               |               |               |                |                |                  |                |                  |               |    |                   |             |
| Athenolia [3]              | Molaoi   | NR             | NR             | NR            | NR            | NR            | NR             | 42.0 $\pm$ 0.0 | 80.0 $\pm$ 10.0  | 41.0 $\pm$ 3.0 | 99.0 $\pm$ 4.0   | NR            | NR | 1320.0 $\pm$ 60.0 | NR          |
| Kalamata [3]               | Molaoi   | NR             | NR             | NR            | NR            | NR            | NR             | 5.0 $\pm$ 0.0  | 202.0 $\pm$ 9.0  | 5.0 $\pm$ 0.0  | 748.0 $\pm$ 52.0 | NR            | NR | 1000.0 $\pm$ 67.0 | NR          |
| Koroneiki [3]              | Molaoi   | NR             | NR             | NR            | NR            | NR            | NR             | NR             | 135.0 $\pm$ 3.0  | NR             | 150.0 $\pm$ 11.0 | NR            | NR | 878.0 $\pm$ 60.0  | NR          |

| Supplementary Table S2. Cont |                  |               |                |           |            |     |               |               |                |               |               |               |             |               |             |
|------------------------------|------------------|---------------|----------------|-----------|------------|-----|---------------|---------------|----------------|---------------|---------------|---------------|-------------|---------------|-------------|
| Cultivar                     | Location         | Location      | HT             | TY        | VA         | PCA | CA            | OLE           | OLEAG          | OLEAC         | LA            | OLEOC         | PINO        | LU            | TPC         |
| Koroneiki [4]                | Rethymnon        | 10.9 ± 0.2    | 4.9 ± 0.1      | NR        | NR         | NR  | NR            | 7.0 ± 0.3     | 3.5 ± 0.2      | NR            | 5.9 ± 0.0     | NR            | NR          | NR            | NR          |
| Throubolia [3]               | Molaoi           | NR            | NR             | NR        | NR         | NR  | NR            | 41.0 ± 3.0    | 22.0 ± 1.0     | 35.0 ± 3.0    | 20.0 ± 0.0    | NR            | NR          | 1550.0 ± 36.0 | NR          |
| Throumbolia [4]              | Rethymnon        | 13.5 ± 0.9    | 4.5 ± 0.5      | NR        | NR         | NR  | NR            | 1.4 ± 0.0     | 1.2 ± 0.0      | NR            | 8.9 ± 0.0     | NR            | NR          | NR            | NR          |
| Italy                        |                  |               |                |           |            |     |               |               |                |               |               |               |             |               |             |
| Barone di Monteprofico [5]   | Apulia           | 9.5 ± 0.8     | NR             | NR        | NR         | NR  | NR            | 4.3 ± 0.5     | 7.9 ± 0.1      | 4.3 ± 0.2     | 4.3 ± 0.2     | 18.6 ± 0.1    | 9.9 ± 0.7   | 202 ± 14      | NR          |
| Bosana [6]                   | Sardinia         | 55.0          | 30.3           | NR        | NR         | NR  | NR            | 778.0         | 213.1          | 165.4         | 6.2           | NR            | 20.8        | NR            | 130.5       |
| Casaliva [6]                 | Garda            | 70.9          | 40.2           | NR        | NR         | NR  | NR            | 799.6         | 239.1          | 107.7         | 7.3           | NR            | 30.6        | NR            | 112.6       |
| Cellina di Nardò [5]         | Apulia           | 6.9 ± 0.9     | NR             | NR        | NR         | NR  | NR            | 15.3 ± 0.2    | 73.6 ± 0.5     | 68.3 ± 0.5    | 68.3 ± 0.5    | 1.4 ± 0.4     | 8.0 ± 0.7   | 253 ± 7       | NR          |
| Colozzese [5]                | Apulia           | 25.8 ± 0.6    | NR             | NR        | NR         | NR  | NR            | 28.2 ± 0.7    | 39.0 ± 0.7     | 75.4 ± 0.2    | 75.4 ± 0.2    | 6.5 ± 0.4     | 7.6 ± 0.4   | 251 ± 12      | NR          |
| Cornola [5]                  | Apulia           | 1.8 ± 0.4     | NR             | NR        | NR         | NR  | NR            | 33.1 ± 0.7    | 11.7 ± 0.2     | 10.2 ± 0.6    | 10.2 ± 0.6    | 1.6 ± 0.2     | 2.2 ± 0.5   | 189 ± 10      | NR          |
| Leccio del Corno [6]         | Campania         | 140.0         | 43.5           | NR        | NR         | NR  | NR            | 896.8         | 279.2          | 193.0         | 16.2          | NR            | 18.1        | NR            | 176.2       |
| Mixture [7]                  | Sicily           | 36.7 ± 20.7   | 23.1 ± 22.8    | 1.7 ± 0.8 | 1.7 ± 0.7  | NR  | 347.6 ± 180.3 | 37.0 ± 17.0   | 374.8 ± 319.2  | 126.1 ± 43.3  | NR            | NR            | 12.3 ± 0.7  | 159.1 ± 45.2  | NR          |
| Mixture [7]                  | Puglia           | 21.8 ± 20.0   | 12.8 ± 17.3    | 1.9 ± 0.5 | 1.4 ± 0.1  | NR  | 631.2 ± 216.3 | 187.2 ± 110.3 | 619.0 ± 171.1  | 434.7 ± 235.2 | NR            | NR            | 14.1 ± 1.3  | 335.2 ± 112.9 | NR          |
| Mixture [7]                  | Tuscany          | 13.5 ± 11.4   | 5.0 ± 4.4      | 1.6 ± 0.8 | 1.7 ± 0.7  | NR  | 479.5 ± 151.1 | 294.7 ± 330.9 | 689.4 ± 385.3  | 327.0 ± 245.7 | NR            | NR            | 13.8 ± 0.9  | 348.2 ± 148.5 | NR          |
| Mixture [7]                  | Lazio            | 14.5 ± 8.0    | 6.0 ± 5.5      | 1.9 ± 0.8 | 1.7 ± 0.4  | NR  | 565.0 ± 209.0 | 59.3 ± 41.8   | 840.2 ± 418.7  | 188.1 ± 25.0  | NR            | NR            | 14.2 ± 1.6  | 238.5 ± 70.1  | NR          |
| Ogliarola di Lecce [5]       | Apulia           | 6.6 ± 0.8     | NR             | NR        | NR         | NR  | NR            | 24.1 ± 0.4    | 64.9 ± 0.6     | 64.5 ± 0.8    | 64.5 ± 0.8    | 4.6 ± 0.6     | 7.6 ± 0.3 d | 278 ± 9       | NR          |
| Oliva Bianca [8]             | Campania         | 12.0 ± 0.6    | 16.4 ± 0.0     | 0.5 ± 0.0 | 1.1 ± 0.0  | NR  | <LOD          | 85.9 ± 0.5    | 33.4 ± 0.0     | 122.4 ± 3.9   | 255.2 ± 7.1   | NR            | 17.2 ± 2.4  | 648.9 ± 2.8   | NR          |
| Oliva Grossa [5]             | Apulia           | 12.1 ± 0.5    | NR             | NR        | NR         | NR  | NR            | 34.3 ± 0.8    | 124.4 ± 0.5    | 103.4 ± 0.8   | 103.4 ± 0.8   | 21.9 ± 0.6    | 16.7 ± 0.6  | 273 ± 3       | NR          |
| Oliva Rossa [9]              | Bari             | 0.4 ± 0.1     | 0.5 ± 0.0      | 0.2 ± 0.0 | NR         | NR  | NR            | NR            | 25.8 ± 4.6     | 8.6 ± 1.7     | 14.0 ± 0.8    | 9.9 ± 0.7     | 6.8 ± 0.6   | NR            | 237.2 ± 4.5 |
| Cultivar                     | Location         | Location      | HT             | TY        | VA         | PCA | CA            | OLE           | OLEAG          | OLEAC         | LA            | OLEOC         | PINO        | LU            | TPC         |
| Orniella [5]                 | Apulia           | 7.1 ± 0.1     | NR             | NR        | NR         | NR  | NR            | 26.2 ± 0.8    | 13.2 ± 0.5     | 6.7 ± 0.7     | 6.7 ± 0.7     | 1.6 ± 0.4     | 13.2 ± 0.2  | 198 ± 3       | NR          |
| Quercetano [10]              | Tuscany (hills)  | 678.2 ± 24.3  | 771.8 ± 38.7   | 6.8 ± 0.3 | 3.2 ± 0.2  | NR  | NR            | 330.8 ± 9.4   | 803.3 ± 46.1   | 756.1 ± 54.3  | 1102.6 ± 71.3 | 1819.4 ± 52.0 | 64.3 ± 4.1  | NR            | NR          |
| Quercetano [10]              | Tuscany (plains) | 2167.8 ± 93.3 | 1697.5 ± 123.0 | 4.0 ± 0.1 | 10.3 ± 0.7 | NR  | NR            | 244.5 ± 8.7   | 2610.9 ± 169.5 | 251.7 ± 20.0  | 1316.2 ± 95.0 | 664.6 ± 23.8  | 85.8 ± 6.2  | NR            | NR          |

| Supplementary Table S2. Cont |             |             |              |           |           |            |           |              |             |             |               |           |             |               |              |
|------------------------------|-------------|-------------|--------------|-----------|-----------|------------|-----------|--------------|-------------|-------------|---------------|-----------|-------------|---------------|--------------|
| Cultivar                     | Location    | Location    | HT           | TY        | VA        | PCA        | CA        | OLE          | OLEAG       | OLEAC       | LA            | OLEOC     | PINO        | LU            | TPC          |
| Spina [5]                    | Apulia      | 0.9 ± 0.5   | NR           | NR        | NR        | NR         | NR        | 52.6 ± 0.6   | 19.4 ± 0.3  | 12.4 ± 0.8  | 12.4 ± 0.8    | 3.4 ± 0.5 | 7.8 ± 0.5 d | 138 ± 7       | NR           |
| Lebanon                      |             |             |              |           |           |            |           |              |             |             |               |           |             |               |              |
| Baladi [11]                  | Abdeh       | 4.3         | 3.2          | 2.8       | 2.2       | NR         | NR        | NR           | 27.0        | NR          | 73.5          | NR        | 7.2         | 321           | NR           |
| Baladi [11]                  | Abdeh       | 3.7         | 2.2          | 2.7       | 1.9       | NR         | NR        | NR           | 27.8        | NR          | 48.4          | NR        | 3.9         | 301           | NR           |
| Morocco                      |             |             |              |           |           |            |           |              |             |             |               |           |             |               |              |
| Arbequine [12]               | Meknes      | NR          | 22.0 ± 3.0   | 1.5 ± 0.3 | NR        | NR         | 3.9 ± 0.2 | NR           | NR          | NR          | NR            | NR        | 4.1 ± 0.1   | NR            | NR           |
| Arbosana, Arbequine) [12]    | Meknes      | NR          | 13.8 ± 0.0   | 4.5 ± 0.1 | NR        | NR         | 3.0 ± 0.5 | NR           | NR          | NR          | NR            | NR        | 4.0 ± 0.3   | NR            | NR           |
| Koroneiki [12]               | Meknes      | NR          | 14.0 ± 1.0   | 6.0 ± 2.0 | NR        | NR         | 5.8 ± 0.6 | NR           | NR          | NR          | NR            | NR        | 1.0 ± 0.0   | NR            | NR           |
| Picholine [13]               | Taounate    | 6.4 ± 0.5   | <LOD         | NR        | NR        | NR         | NR        | 231.3 ± 4.4  | 3.1 ± 0.1   | 57.3 ± 2.9  | <LOD          | NR        | <LOQ        | 354.2         | 100.4 ± 0.1  |
| Picholine [13]               | Chefchaouen | 40.0 ± 1.5  | 300.6 ± 11.3 | NR        | NR        | NR         | NR        | 198.3 ± 13.2 | 33.3 ± 1.9  | 21.4 ± 0.4  | <LOQ          | NR        | 6.4 ± 0.2   | 723.4         | 55.3 ± 0.3   |
| Picholine [13]               | Taza        | 2.8 ± 0.1   | <LOD         | NR        | NR        | NR         | NR        | 18.6 ± 0.0   | 2.3 ± 0.0   | 1.2 ± 0.1   | <LOQ          | NR        | 7.8 ± 0.7   | 50.4          | 38. ± 0.1    |
| Picholine [12]               | Meknes      | NR          | 29.4 ± 0.6   | 1.9 ± 0.3 | NR        | NR         | 5.6 ± 0.4 | NR           | NR          | NR          | NR            | NR        | 2.1 ± 0.0   | NR            | NR           |
| Picual [12]                  | Meknes      | NR          | 12.0 ± 6.0   | 2.0 ± 1.0 | NR        | NR         | 1.5 ± 0.8 | NR           | NR          | NR          | NR            | NR        | 2.0 ± 1.0   | NR            | NR           |
| Spain                        |             |             |              |           |           |            |           |              |             |             |               |           |             |               |              |
| Arbequina [14]               | Extremadura | 1.6 ± 1.8   | 1.3 ± 1.0    | 1.2 ± 0.9 | 0.3 ± 0.3 | NR         | NR        | 25.0 ± 5.2   | NR          | NR          | 77.4 ± 84.3   | NR        | 2.5 ± 5.5   | 200.2 ± 177.1 | NR           |
| Arbequina [15]               | Zaragoza    | 2.5 ± 0.2   | 1.9 ± 0.7    | 0.7 ± 0.1 | 0.2 ± 0.1 | 15.5 ± 3.3 | NR        | 11.6 ± 1.6   | 26.6 ± 4.8  | 2.8 ± 0.9   | 17.4 ± 2.1    | 6.2 ± 2.1 | NR          | 367.6         | 187.9 ± 15.1 |
| Arbequina [16]               | Mallorca    | 42.0 ± 0.3  | 6.8 ± 0.2    | 0.2 ± 0.0 | 0.4 ± 0.1 | 0.0 ± 0.0  | NR        | 5.5 ± 0.0    | 93.0 ± 4.9  | 16.3 ± 5.7  | 6.4 ± 3.9     | 2.5 ± 0.1 | 3.0 ± 0.2   | 180.9 ± 5.9   | NR           |
| Blanqueta [17]               | Jaén        | 6.7 ± 0.0   | 3.6 ± 0.0    | 0.0 ± 0.0 | 0.1 ± 0.0 | 20.0 ± 0.1 | NR        | 59.8 ± 0.3   | 1067 ± 6.0  | 37.2 ± 0.2  | 313.2 ± 1.8   | 2.0 ± 0.0 | 0.3 ± 0.0   | NR            | NR           |
| Corbella [18]                | Barcelona   | 0.7 ± 0.1   | NR           | NR        | 0.7 ± 0.0 | NR         | NR        | 135.9 ± 3.0  | NR          | 11.9 ± 0.5  | NR            | 6.6 ± 0.7 | 0.3 ± 0.0   | 483.7 ± 26.6  | NR           |
| Cornicabra [14]              | Extremadura | 10.2 ± 12.7 | 9.3 ± 12.5   | 0.2 ± 0.3 | 0.3 ± 0.4 | NR         | NR        | 94.6 ± 107.9 | NR          | NR          | 230.4 ± 138.6 | NR        | 1.0 ± 1.4   | 632.6 ± 405.9 | NR           |
| Cornicabra [15]              | Toledo      | 8.1 ± 3.5   | 8.7 ± 0.2    | 1.5 ± 0.6 | 0.3 ± 0.0 | 3.3 ± 1.0  | NR        | 13.4 ± 1.0   | 1.1 ± 0.0   | 6.1 ± 1.8   | 6.4 ± 0.8     | 6.3 ± 2.4 | NR          | 214.9         | 241.4 ± 2.3  |
| Cornicabra [16]              | Toledo      | 34.5 ± 13.0 | 13.8 ± 3.1   | 0.2 ± 0.0 | 0.0 ± 0.0 | 0.0 ± 0.0  | NR        | 25.4 ± 4.8   | 25.0 ± 4.2  | 21.2 ± 0.5  | 12.5 ± 11.9   | 1.9 ± 0.1 | 0.8 ± 0.0   | 138.9 ± 36.6  | NR           |
| Cuquillo [15]                | Murcia      | 5.5 ± 0.5   | 5.4 ± 0.9    | 1.6 ± 0.2 | 0.2 ± 0.1 | 4.3 ± 1.8  | NR        | 23.7 ± 4.1   | 11.1 ± 1.7  | 9.2 ± 2.4   | 9.4 ± 2.2     | 5.4 ± 0.3 | NR          | 295.3         | 165.9 ± 9.6  |
| Empeltre [15]                | Teruel      | 4.3 ± 1.0   | 2.5 ± 0.3    | 1.2 ± 0.9 | 0.1 ± 0.0 | 11.4 ± 2.1 | NR        | 4.8 ± 1.0    | 9.7 ± 0.6   | 5.4 ± 0.2   | 8.6 ± 1.8     | 4.3 ± 1.2 | NR          | 195.2         | 344.3 ± 15.4 |
| Habichuelero [17]            | Jaén        | 3.7 ± 0.1   | 3.2 ± 0.1    | 0.0 ± 0.0 | 0.1 ± 0.0 | 5.4 ± 0.1  | NR        | 84.4 ± 1.4   | 292.8 ± 4.9 | 107.0 ± 1.8 | 104.7 ± 1.8   | 0.6 ± 0.0 | 0.2 ± 0.0   | NR            | NR           |
| Hojiblanca [15]              | Jaén        | 0.8 ± 0.0   | 4.3 ± 0.9    | 2.7 ± 0.1 | 0.7 ± 0.1 | 2.9 ± 0.9  | NR        | 5.6 ± 0.1    | 2.8 ± 0.9   | 7.3 ± 0.6   | 6.9 ± 0.2     | 4.8 ± 1.1 | NR          | 210.9         | 286.8 ± 9.7  |
| Hojiblanca [16]              | Antequera   | 28.31       | 9.941        | 0.356     | 0.384     | 0.008      | NR        | 10.18        | 56.14       | 3.9         | 4.747         | 0.738     | 1.561       | 127.7         | NR           |
| Hojiblanca [16]              | Córdoba     | 28.7 ± 1.8  | 7.3 ± 2.8    | 0.5 ± 0.1 | 0.9 ± 0.1 | 0.0 ± 0.0  | NR        | 21.0 ± 9.5   | 19.7 ± 5.7  | 23.3 ± 20.1 | 4.7 ± 2.0     | 0.3 ± 0.9 | 2.0 ± 1.2   | 115.2 ± 23.8  | NR           |

| Supplementary Table S2. Cont   |              |             |             |            |           |           |            |              |             |             |               |            |            |               |              |
|--------------------------------|--------------|-------------|-------------|------------|-----------|-----------|------------|--------------|-------------|-------------|---------------|------------|------------|---------------|--------------|
| Cultivar                       | Location     | Location    | HT          | TY         | VA        | PCA       | CA         | OLE          | OLEAG       | OLEAC       | LA            | OLEOC      | PINO       | LU            | TPC          |
| Hojiblanca (organic) [19]      | Córdoba      | 4.5 ± 1.1   | NR          | NR         | 0.7 ± 0.1 | NR        | NR         | 7.2 ± 1.0    | NR          | 54.6 ± 10.6 | 186.7 ± 40.6  | 0.5 ± 0.1  | 22.7 ± 5.1 | 456.9 ± 56.7  | NR           |
| Hojiblanca (conventional) [19] | Córdoba      | 3.6 ± 1.3   | NR          | NR         | 1.0 ± 0.4 | NR        | NR         | 4.7 ± 0.4    | NR          | 34.7 ± 8.0  | 132.1 ± 37.0  | 0.8 ± 0.1  | 19.3 ± 5.4 | 338.2 ± 43.0  | NR           |
| Lechin [15]                    | Sevilla      | 5.4 ± 1.8   | 4.1 ± 1.4   | 0.8 ± 0.1  | 0.1 ± 0.0 | 6.3 ± 2.3 | NR         | 11.9 ± 3.6   | 7.2 ± 2.3   | 5.4 ± 0.9   | 8.7 ± 1.7     | 4.5 ± 1.0  | NR         | 303.9         | 191.4 ± 8.1  |
| Lechin [20]                    | Granada      | 3.9±0.0     | 7.3±0.1     | 0.5±0.0    | 0.1±0.0   | NR        | NR         | 0.3±0.0*     | NR          | NR          | NR            | 3.5±0.0    | NR         | NR            | 264±17       |
| Manzanilla [15]                | Cáceres      | 1.9 ± 0.4   | 4.3 ± 1.3   | 1.2 ± 0.0  | 0.4 ± 0.1 | 1.3 ± 0.6 |            | 6.7 ± 2.0    | 11.2 ± 3.2  | 7.1 ± 1.6   | 14.9 ± 1.6    | 6.1 ± 0.9  | NR         | 214.5         | 234.7 ± 14.9 |
| Manzanilla [14]                | Extremadura  | 8.5 ± 9.3   | 13.0 ± 8.5  | 0.5 ± 0.3  | 0.7 ± 0.4 | NR        | NR         | 89.2 ± 71.4  | NR          | NR          | 117.3 ± 123.0 | NR         | 2.5 ± 3.7  | 468.8 ± 348.2 | ± NR         |
| Manzanilla [14]                | Extremadura  | 6.2 ± 3.9   | 7.1 ± 2.8   | 1.2 ± 1.4  | 1.5 ± 0.7 | NR        | NR         | 150.7 ± 94.2 | NR          | NR          | 151.6 ± 93.4  | NR         | 2.7 ± 4.0  | 497.5 ± 284.1 | ± NR         |
| Morisca [14]                   | Extremadura  | 6.7 ± 3.8   | 4.9 ± 2.0   | 0.5 ± 0.4  | 2.2 ± 1.3 | NR        | NR         | 47.4 ± 37.8  | NR          | NR          | 259.3 ± 184.1 | NR         | 2.2 ± 2.8  | 550.2 ± 346.8 | ± NR         |
| Pico Limón [14]                | Extremadura  | 12.4 ± 16.5 | 9.7 ± 13.7  | 0.7 ± 0.6  | 0.3 ± 0.5 | NR        | NR         | 77.7 ± 128.2 | NR          | NR          | 135.3 ± 123.3 | NR         | 3.4 ± 5.4  | 406.8 ± 415.2 | ± NR         |
| Picual [14]                    | Extremadura  | 12.8 ± 9.6  | 7.8 ± 4.4   | 1.3 ± 0.7  | 0.7 ± 0.3 | NR        | NR         | 49.4 ± 61.0  | NR          | NR          | 95.4 ± 54.9   | NR         | 4.7 ± 7.9  | 380.4 ± 252.8 | ± NR         |
| Picual [17]                    | Jaén         | 0.7 ± 0.0   | 2.2 ± 0.1   | 0.6 ± 0.0  | 0.3 ± 0.0 | 3.3 ± 0.1 | NR         | 98.8 ± 2.9   | 174.0 ± 5.3 | 104.0 ± 3.1 | 31.6 ± 0.9    | 3.2 ± 0.0  | 4.7 ± 0.1  | NR            | NR           |
| Picual [15]                    | Jaén         | NR          | 4.0 ± 0.8   | 0.6 ± 0.2  | 0.2 ± 0.1 | 2.1 ± 0.2 | NR         | 0.1 ± 0.0    | 0.1 ± 0.0   | 11.2 ± 0.9  | 5.8 ± 1.7     | 3.9 ± 0.9  | NR         | 86.9          | 249.5 ± 22.1 |
| Picudo [15]                    | Córdoba      | 5.9 ± 0.8   | 7.8 ± 3.8   | 1.4 ± 0.3  | 1.5 ± 0.0 | 4.6 ± 0.8 | NR         | 10.2 ± 1.6   | 12.6 ± 2.9  | 9.5 ± 2.1   | 17.9 ± 1.6    | 7.8 ± 1.7  | NR         | 339.9         | 194.2 ± 15.0 |
| Picudo [16]                    | Córdoba      | 11.4 ± 1.9  | 24.0 ± 5.3  | 0.2 ± 0.0  | 0.4 ± 0.1 | 0.0 ± 0.0 | NR         | 18.6 ± 2.7   | 33.8 ± 0.9  | 13.1 ± 9.8  | 6.4 ± 8.1     | 0.0 ± 0.0  | 1.6 ± 0.2  | 113.5 ± 19.5  | NR           |
| Picudo [16]                    | Granada      | 12.4        | 0.0         | 0.1        | 0.0       | 0.0       | NR         | 43.0         | 27.6        | 6.8         | 3.5           | 0.2        | 1.9        | 101.8         | NR           |
| Sevillana [17]                 | Jaén         | 0.9 ± 0.0   | 2.44 ± 0.0  | 0.6 ± 0.0  | 0.3 ± 0.0 | 2.0 ± 0.0 | NR         | 11.1 ± 0.0   | 104.4 ± 0.3 | 9.4 ± 0.0   | 25.1 ± 0.0    | 8.0 ± 0.0  | 2.9 ± 0.0  | NR            | NR           |
| Verdial [14]                   | Extremadura  | 8.0 ± 10.8  | 10.0 ± 10.2 | 0.4 ± 0.4  | 1.0 ± 0.7 | NR        | NR         | 39.4 ± 39.8  | NR          | NR          | 187.7 ± 213.7 | NR         | 3.5 ± 4.3  | 551.4 ± 497.1 | ± NR         |
| Tunisia                        |              |             |             |            |           |           |            |              |             |             |               |            |            |               |              |
| Arbequina [21]                 | Borj El Amri | 2.7 ± 0.1   | 1.3 ± 0.0   | 0.6 ± 0.0  | 0.3 ± 0.0 | NR        | 2.6 ± 0.0  | NR           | NR          | 0.2 ± 0.0   | NR            | 4.9 ± 0.0  | 12.6 ± 0.2 | 109.2 ± 0.0   | NR           |
| Chemlali [22]                  | Hammamet     | 17.0 ± 0.1  | 40.5 ± 0.4  | 11.2 ± 0.2 | 1.5 ± 0.1 | NR        | 21.7 ± 0.9 | 26.9 ± 0.8   | 8.2 ± 1.1   | 11.3 ± 1.1  | 6.6 ± 0.4     | 23.8 ± 1.3 | 4.9 ± 0.1  | NR            | NR           |
| Chemlali [22]                  | Gafsa        | 9.6 ± 0.1   | 36.4 ± 0.3  | 1.8 ± 0.1  | 8.5 ± 1.2 | NR        | 2.3 ± 0.1  | 26.3 ± 1.2   | 11.8 ± 0.6  | 3.9 ± 0.4   | 1.5 ± 0.1     | 2.7 ± 0.3  | 1.1 ± 0.1  | NR            | NR           |
| Chemlali [22]                  | Kairouan     | 12.7 ± 0.1  | 25.1 ± 0.6  | 1.2 ± 0.9  | 1.4 ± 0.1 | NR        | 12.3 ± 0.7 | 79.8 ± 1.4   | 23.9 ± 0.9  | 9.7 ± 0.9   | 2.0 ± 0.7     | 22.0 ± 0.6 | 5.8 ± 0.6  | NR            | NR           |
| Chemlali [22]                  | Sfax         | 19.8 ± 0.2  | 16.0 ± 0.1  | 1.6 ± 0.4  | 1.5 ± 0.2 | NR        | 7.5 ± 1.0  | 43.7 ± 0.7   | 3.3 ± 0.4   | 4.1 ± 0.4   | 1.1 ± 0.5     | 23.2 ± 0.3 | 5.9 ± 0.2  | NR            | NR           |
| Chemlali [22]                  | Zarzis       | 24.1 ± 0.2  | 19.5 ± 0.2  | 1.4 ± 0.6  | 1.5 ± 0.4 | NR        | 1.5 ± 0.4  | 60.2 ± 1.0   | 12.3 ± 0.8  | 6.1 ± 1.2   | 1.5 ± 0.1     | 2.8 ± 0.1  | 1.7 ± 0.1  | NR            | NR           |



**Supplementary Table S2.** *Cont*

| Cultivar                       | Location     | Location   | HT         | TY        | VA        | PCA       | CA        | OLE          | OLEAG  | OLEAC      | LA   | OLEOC     | PINO       | LU           | TPC |
|--------------------------------|--------------|------------|------------|-----------|-----------|-----------|-----------|--------------|--------|------------|------|-----------|------------|--------------|-----|
| Chetoui [21]                   | Borj El Amri | 15.1 ± 0.2 | 23.2 ± 0.3 | 1.1 ± 0.0 | 0.8 ± 0.0 | NR        | 2.2 ± 0.0 | 381.6 ± 15.5 | NR     | 9.7 ± 0.4  | NR   | 6.5 ± 0.1 | 13.2 ± 0.3 | 492.6 ± 15.0 | NR  |
| Neb Jmal [21]                  | Borj El Amri | 6.2 ± 0.1  | 16.5 ± 0.1 | 2.1 ± 0.0 | 1.8 ± 0.0 | NR        | 0.0 ± 0.0 | 30.6 ± 0.1   | NR     | 12.2 ± 0.1 | NR   | 0.0 ± 0.0 | 17.1 ± 0.2 | 298.5 ± 11.2 | NR  |
| Picholine [21]                 | Borj El Amri | 22.6 ± 0.0 | 17.0 ± 0.1 | 0.4 ± 0.0 | 0.0 ± 0.0 | NR        | 0.0 ± 0.0 | NR           | NR     | 17.3 ± 0.0 | NR   | 0.0 ± 0.0 | 4.3 ± 0.0  | 418.7 ± 0.5  | NR  |
| Oueslati [23]                  | Jbel Rihan   | 5.8        | 2.3        | NR        | NR        | NR        | NR        | 537.8        | 2394.0 | 19.4       | 45.3 | NR        | 6.5        | NR           | NR  |
| Oueslati [23]                  | Ain Jouloula | 6.5        | 1.9        | NR        | NR        | NR        | NR        | 360.3        | 644.6  | 2.9        | 3.2  | 0.6       | 0.9        | NR           | NR  |
| Oueslati [23]                  | Khit el Oued | 5.1        | 1.8        | NR        | NR        | NR        | NR        | 330.1        | 1601.9 | 4.3        | 20.9 | 0.7       | 1.0        | NR           | NR  |
| Oueslati [23]                  | Haffouz      | 6.1        | 2.1        | NR        | NR        | NR        | NR        | 461.4        | 1496.5 | 7.9        | 18.5 | 0.6       | 1.4        | NR           | NR  |
| Oueslati [23]                  | Menzel Rais  | 5.9        | 3.1        | NR        | NR        | NR        | NR        | 270.2        | 910.0  | 14.0       | 11.5 | 0.7       | 1.4        | NR           | NR  |
| Oueslati [23]                  | Ala          | 7.2        | 2.4        | NR        | NR        | NR        | NR        | 222.6        | 1834.1 | 9.9        | 16.1 | 1.2       | 0.7        | NR           | NR  |
| Oueslati [23]                  | Sfax         | 3.8        | 2.3        | NR        | NR        | NR        | NR        | 385.2        | 828.2  | 5.2        | 7.9  | 0.7       | 0.9        | NR           | NR  |
| Turkey                         |              |            |            |           |           |           |           |              |        |            |      |           |            |              |     |
| Mixture (mainly Ay-valik) [24] | North Izmir  | 7.4 ± 6.7  | 4.9 ± 5.0  | 0.2 ± 0.1 | 0.3 ± 0.2 | 0.1 ± 0.0 | NR        | NR           | NR     | NR         | NR   | NR        | 1.1 ± 1.0  | 230.7 ± 55.3 | NR  |
| Mixture (mainly Me-mecik) [24] | South Izmir  | 3.9 ± 2.6  | 10.7 ± 7.4 | 0.1 ± 0.1 | 0.7 ± 0.5 | 0.7 ± 0.2 | NR        | NR           | NR     | NR         | NR   | NR        | 1.3 ± 0.9  | 287.3 ± 58.2 | NR  |

\* the determination includes both aldehyde forms of oleuropeinm; LOD: limit of detection; LOQ: limit of quantitation; HT: hydroxi-tyrosol (3,4-DHPEA); TY: tyrosol (p-HPEA); VA: vanillic acid; PCA: p-coumaric acid; CA: cinnamic acid; OLE: oleuropein (3,4-DHPEA-elenolic acid glucoside); OLEAG: oleuropein-aglycone (3,4-DHPEA-EA); OLEAC: oleacein (3,4-DHPEA-EDA); LA: ligstroside-aglycone (p-HPEA-EA); OLEOC: oleocanthal (p-HPEA-EDA); PINO: (+)-pinorelinol; LU: luteolin; TPC: total phenolic content; α-T: α-tocopherol

1. Douzane, M.; Tamendjari, A.; Abdi, A.K.; Daas, M.S.; Mehdi, F.; Bellal, M.M. Phenolic compounds in mono-cultivar extra virgin olive oils from algeria. *Grasas y Aceites* **2013**, *64*, 285–294, doi:10.3989/gya.072212.
2. Torić, J.; Barbarić, M.; Uršić, S.; Jakobušić Brala, C.; Karković Marković, A.; Zebić Avdičević, M.; Benčić, Đ. Antique traditional practice: phenolic profile of virgin olive oil obtained from fruits stored in seawater. *Foods* **2020**, *9*, 1347, doi:10.3390/foods9101347.
3. Diamantakos, P.; Giannara, T.; Skarkou, M.; Melliou, E.; Magiatis, P. Influence of harvest time and malaxation conditions on the concentration of individual phenols in extra virgin olive oil related to its healthy properties. *Molecules* **2020**, *25*, 2449, doi:10.3390/molecules25102449.
4. Vekari, S.A.; Oreopoulou, V.; Kourkoutas, Y.; Kamoun, N.; Msallem, M.; Psimouli, V.; Arapoglou, D. Characterization and seasonal variation of the quality of virgin olive oil of the throumbolia and koroneiki varieties from Southern Greece. *Grasas y Aceites* **2010**, *61*, 221–231, doi:10.3989/gya.108709.
5. Negro, C.; Aprile, A.; Luvisi, A.; Nicoli, F.; Nutricati, E.; Vergine, M.; Miceli, A.; Blando, F.; Sabella, E.; De Bellis, L. Phenolic profile and antioxidant activity of Italian monovarietal extra virgin olive oils. *Antioxidants* **2019**, *8*, 161, doi:10.3390/antiox8060161.
6. Różańska, A.; Russo, M.; Cacciola, F.; Salafia, F.; Polkowska, Ż.; Dugo, P.; Mondello, L. Concentration of potentially bioactive compounds in Italian extra virgin olive oils from various sources by using LC-MS and multivariate data analysis. *Foods* **2020**, *9*, 1120, doi:10.3390/foods9081120.

7. Fanali, C.; Della Posta, S.; Vilmercati, A.; Dugo, L.; Russo, M.; Petitti, T.; Mondello, L.; de Gara, L. Extraction, analysis, and antioxidant activity evaluation of phenolic compounds in different italian extra-virgin olive oils. *Molecules* **2018**, *23*, 3249, doi:10.3390/molecules23123249. 40
8. Di Vaio, C.; Graziani, G.; Gaspari, A.; De Luca, L.; Aiello, A.; Cirillo, A.; Bruno, A.; Romano, R.; Ritieni, A. Drupe characters, fatty acids, polyphenolic and aromatic profile of olive oil obtained from “oliva bianca”, minor autochthonous cultivar of Campania. *Plants* **2021**, *10*, 1119, doi:10.3390/plants10061119.
9. Squeo, G.; Silletti, R.; Mangini, G.; Summo, C.; Caponio, F. The potential of apulian olive biodiversity: the case of oliva rossa virgin olive oil. *Foods* **2021**, *10*, 369, doi:10.3390/foods10020369.
10. Barbalace, M.C.; Zallocco, L.; Beghelli, D.; Ronci, M.; Scortichini, S.; Digiaco, M.; Macchia, M.; Mazzoni, M.R.; Fiorini, D.; Lucacchini, A.; et al. Antioxidant and neuroprotective activity of extra virgin olive oil extracts obtained from quercetano cultivar trees grown in different areas of the Tuscany region (Italy). *Antioxidants* **2021**, *10*, 421, doi:10.3390/antiox10030421.
11. El Riachy, M.; Hamade, A.; Ayoub, R.; Dandachi, F.; Chalak, L. Oil content, fatty acid and phenolic profiles of some olive varieties growing in Lebanon. *Front. Nutr.* **2019**, *6*, 94, doi:10.3389/fnut.2019.00094.
12. El Hilali, H.; El Hilali, F.; Porter, S.E.G.; Ghali, S.A.; Meyls, H.M.; Ouazzani, N.; Laziri, F.; Barber, A. Olive oil varieties cultivated in Morocco reduce reactive oxygen species and cell viability of human cervical cancer cells. *MNM* **2020**, *13*, 89–100, doi:10.3233/MNM-190390.
13. Bouymajane, A.; Oulad El Majdoub, Y.; Cacciola, F.; Russo, M.; Salafia, F.; Trozzi, A.; Rhazi Filali, F.; Dugo, P.; Mondello, L. Characterization of phenolic compounds, vitamin E and fatty acids from monovarietal virgin olive oils of “picholine marocaine” cultivar. *Molecules* **2020**, *25*, 5428, doi:10.3390/molecules25225428.
14. Montaña, A.; Hernández, M.; Garrido, I.; Llerena, J.; Espinosa, F. Fatty acid and phenolic compound concentrations in eight different monovarietal virgin olive oils from Extremadura and the relationship with oxidative stability. *IJMS* **2016**, *17*, 1960, doi:10.3390/ijms17111960.
15. Ramos-Escudero, F.; Morales, M.T.; Asuero, A.G. Characterization of bioactive compounds from monovarietal virgin olive oils: relationship between phenolic compounds-antioxidant capacities. *International Journal of Food Properties* **2015**, *18*, 348–358, doi:10.1080/10942912.2013.809542.
16. Becerra-Herrera, M.; Vélez-Martín, A.; Ramos-Merchante, A.; Richter, P.; Beltrán, R.; Sayago, A. Characterization and evaluation of phenolic profiles and color as potential discriminating features among spanish extra virgin olive oils with protected designation of origin. *Food Chemistry* **2018**, *241*, 328–337, doi:10.1016/j.foodchem.2017.08.106.
17. Quintero-Flórez, A.; Pereira-Caro, G.; Sánchez-Quezada, C.; Moreno-Rojas, J.M.; Gaforio, J.J.; Jimenez, A.; Beltrán, G. Effect of olive cultivar on bioaccessibility and antioxidant activity of phenolic fraction of virgin olive oil. *Eur J Nutr* **2018**, *57*, 1925–1946, doi:10.1007/s00394-017-1475-2.
18. López-Yerena, A.; Ninot, A.; Jiménez-Ruiz, N.; Lozano-Castellón, J.; Pérez, M.; Escribano-Ferrer, E.; Romero-Aroca, A.; Lamuela-Raventós, R.M.; Vallverdú-Queralt, A. Influence of the ripening stage and extraction conditions on the phenolic fingerprint of ‘corbella’ extra-virgin olive oil. *Antioxidants* **2021**, *10*, 877, doi:10.3390/antiox10060877.

- 
19. López-Yerena, A.; Lozano-Castellón, J.; Olmo-Cunillera, A.; Tresserra-Rimbau, A.; Quifer-Rada, P.; Jiménez, B.; Pérez, M.; Vallverdú-Queralt, A. Effects of organic and conventional growing systems on the phenolic profile of extra-virgin olive oil. *Molecules* **2019**, *24*, 1986, doi:10.3390/molecules24101986.
  20. Bayram, B.; Esatbeyoglu, T.; Schulze, N.; Ozcelik, B.; Frank, J.; Rimbach, G. Comprehensive analysis of polyphenols in 55 extra virgin olive oils by HPLC-ECD and their correlation with antioxidant activities. *Plant Foods Hum Nutr* **2012**, *67*, 326–336, doi:10.1007/s11130-012-0315-z.
  21. Loubiri, A.; Taamalli, A.; Talhaoui, N.; Mohamed, S.N.; Carretero, A.S.; Zarrouk, M. Usefulness of phenolic profile in the classification of extra virgin olive oils from autochthonous and introduced cultivars in Tunisia. *Eur Food Res Technol* **2017**, *243*, 467–479, doi:10.1007/s00217-016-2760-7.
  22. Gargouri, B.; Ammar, S.; Zribi, A.; Mansour, A.B.; Bouaziz, M. Effect of growing region on quality characteristics and phenolic compounds of chemlali extra-virgin olive oils. *Acta Physiol Plant* **2013**, *35*, 2801–2812, doi:10.1007/s11738-013-1312-z.
  23. Ouni, Y.; Taamalli, A.; Gómez-Caravaca, A.M.; Segura-Carretero, A.; Fernández-Gutiérrez, A.; Zarrouk, M. Characterisation and quantification of phenolic compounds of extra-virgin olive oils according to their geographical origin by a rapid and resolute LC–ESI–TOF MS method. *Food Chemistry* **2011**, *127*, 1263–1267, doi:10.1016/j.foodchem.2011.01.068.
  24. Alkan, D.; Tokatli, F.; Ozen, B. Phenolic characterization and geographical classification of commercial extra virgin olive oils produced in Turkey. *J Am Oil Chem Soc* **2012**, *89*, 261–268, doi:10.1007/s11746-011-1917-6.
